# Supplementary material for: Astroglia proliferate upon the biogenesis of tunneling nanotubes via α-synuclein dependent transient nuclear translocation of focal adhesion kinase
Source: PubMed Central journal article supplement — iScience. 2024 Jul 23;27(8):110565. doi: 10.1016/j.isci.2024.110565 (PMC11342280; doi:10.1016/j.isci.2024.110565), 2024-07-23
Supplement: mmc1.pdf [file mmc1.pdf]

**Supplemental information**

**Astroglia proliferate upon the biogenesis  
of tunneling nanotubes via  $\alpha$ -synuclein dependent  
transient nuclear translocation of focal adhesion kinase**

**Abinaya Raghavan, Rachana Kashyap, P. Sreedevi, Sneha Jos, Suchana Chatterjee, Ann Alex, Michelle Ninochka D'Souza, Mridhula Giridharan, Ravi Muddashetty, Ravi Manjithaya, Sivaraman Padavattan, and Sangeeta Nath**

**Supplementary Information**

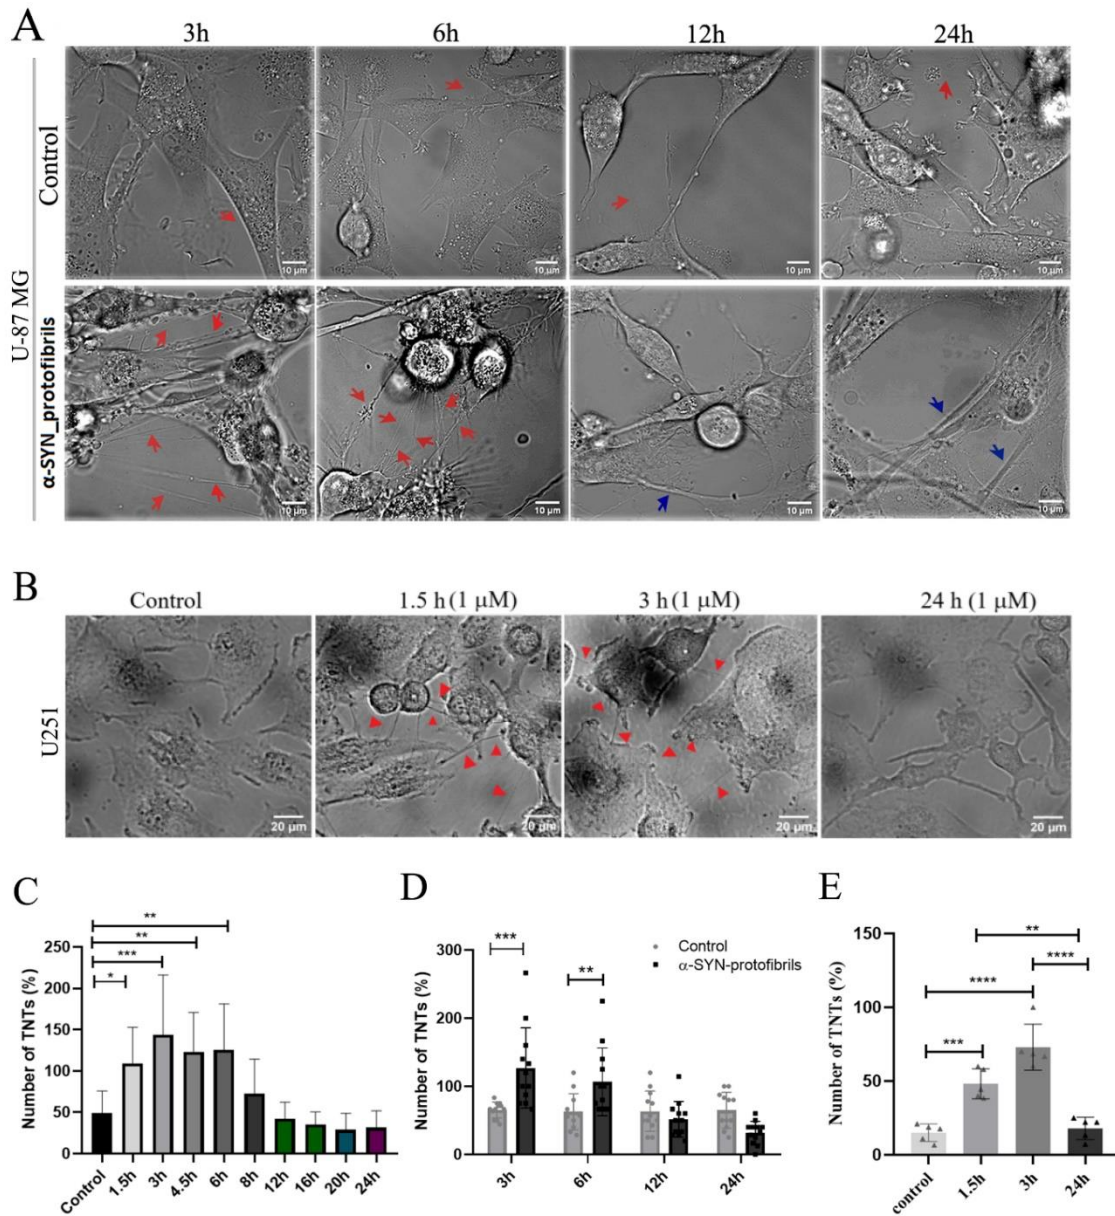

**Figure S1: Transient TNT-biogenesis upon treatment with  $\alpha$ -SYN protofibrils in U-87 MG and U-251 cells, related to Figure 1.** A) U-87 MG and B) U251 cells were treated with  $1\mu\text{M}$   $\alpha$ -SYN protofibrils for varying time points from 1.5h to 24h. Increased TNT formation was observed in the early time points 1.5h-3h (marked by red arrow heads) in the DIC images. C) Percentage of TNT numbers were counted across time points varying from 1.5h-24h on treatment with  $1\mu\text{M}$   $\alpha$ -SYN protofibrils in U-87 MG cells. D, E) Percentage of transient TNT-biogenesis was quantified from U-87 MG (D) and U251 (E) cells compared to their respective controls. Scale bars are denoted on the images. Data are expressed as mean  $\pm$  SD, \*\*\*  $p \leq 0.001$ . Statistics were analysed using one-way ANOVA (EV1C and EV1E) and one-way ANOVA (EV1D).  $n=3$ .

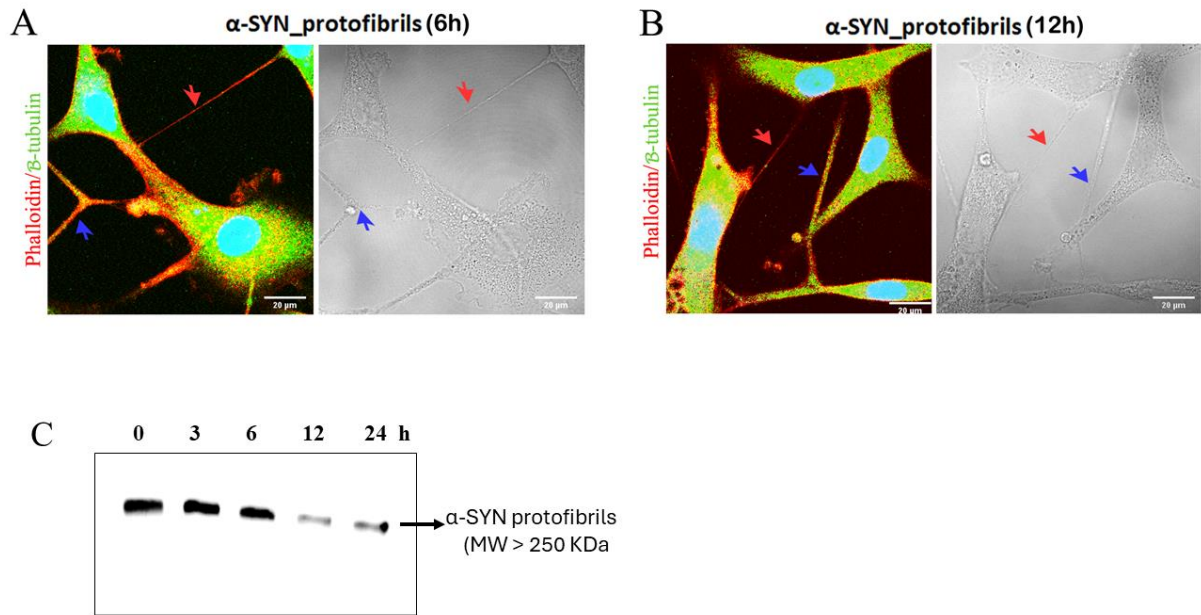

**Figure S2: Identification and characterization of TNTs and TMs, related to Figure 2:** A-B) U-87 MG cells treated with  $1\mu\text{M}$   $\alpha$ -SYN protofibrils for 6h and 12h, stained for actin and  $\beta$ -tubulin. A) Phalloidin-positive actin-stained thin TNTs and B)  $\beta$ -tubulin positive thicker TMs. Fluorescence images stained with phalloidin and  $\beta$ -tubulin (on the left panels) at 6h and 12h. Red arrows indicate actin-positive TNTs and blue arrows indicate  $\beta$ -tubulin positive TMs. The right panels show DIC images of the same.  $n = 3$ . C) Extracellular  $\alpha$ -SYN protofibrils were quantified over time using WB; the protofibrils were detected in the junction of stacking and resolving gel of MW >250 KDa. The results show more than 80% elimination of protofibrils after 12 h of treatment. The WB is shown in Figure S2C.  $n = 3$ .

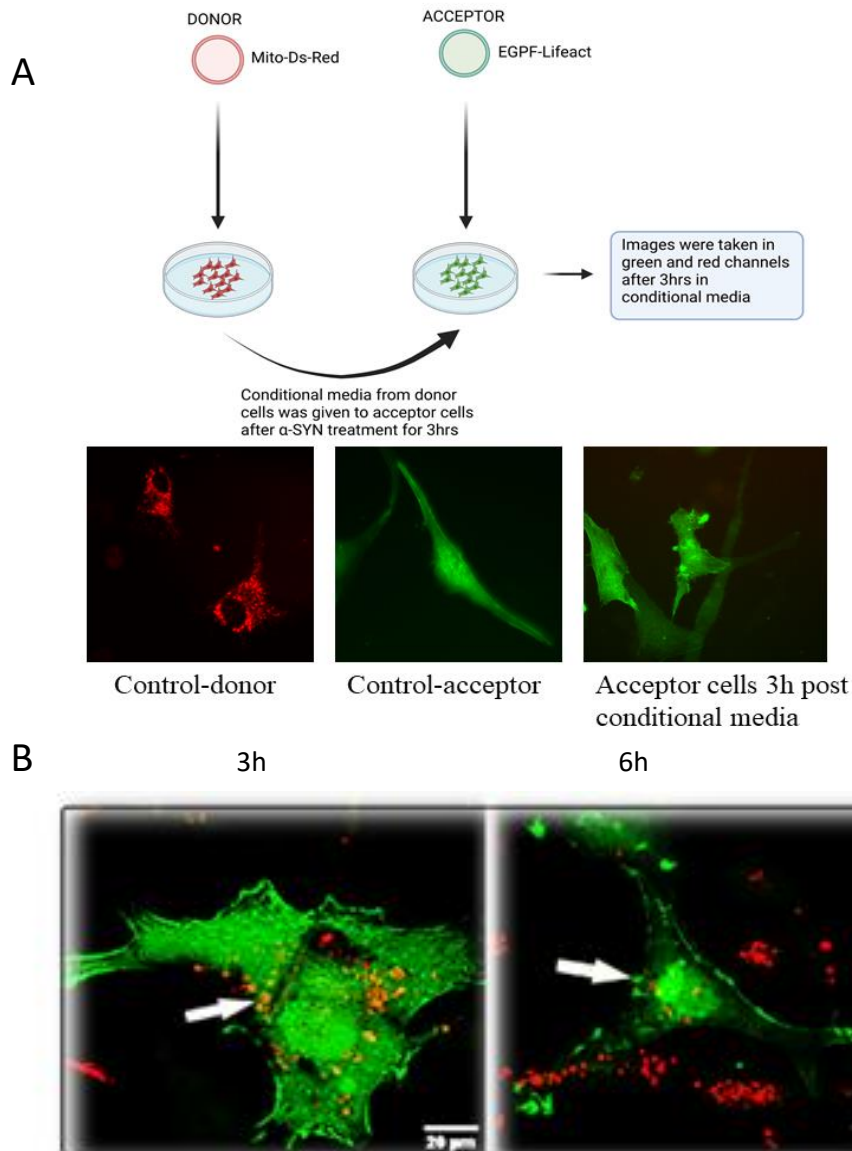

**Figure S3: A) No evidence of cell-to-cell transfer of mitochondria through condition media, related to Figure 5A-C.** Conditional media from the mitoDsRed transfected cells treated with  $1\mu\text{M}$  of  $\alpha$ -SYN for 3 h, was given to the green cells transfected with EGFP-lifeact. Images were taken after 3 h. B) Zoomed images of transferred mitochondria in the acceptor cells after 3 and 6 h treatment with  $\alpha$ -SYN, for the better representation.  $n=3$ .

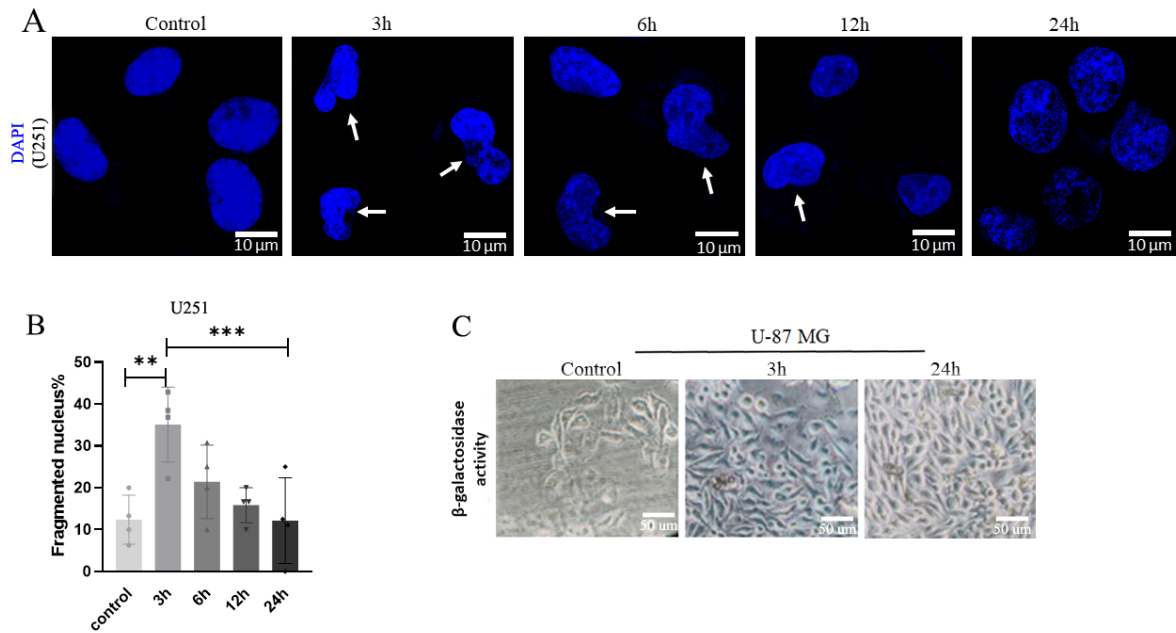

**Figure S4:  $\alpha$ -SYN protofibril induced cellular senescence, related to Figure 5H-J.** A) U251 cells were treated with  $1\mu\text{M}$   $\alpha$ -SYN protofibrils for 3-24h and were stained with DAPI. White arrows indicate fragmented nuclei. B) The percentage of the fragmented nucleus per frame was quantified and plotted. Quantifications are done from 5 image frames of a set and each image frame has 10-20 cells. C) U251 cells were treated with  $1\mu\text{M}$   $\alpha$ -SYN protofibrils for 3-24h and checked for  $\beta$ -galactosidase activity. Cellular senescence-like characteristics of DNA fragmentation and increased  $\beta$ -galactosidase activity (blue color) were observed at early time points. Scale bars are denoted on the images. Data are expressed as mean  $\pm$  SD, \*\*\*  $p \leq 0.001$ . Statistics were analysed using two-way ANOVA.  $n=3$ .

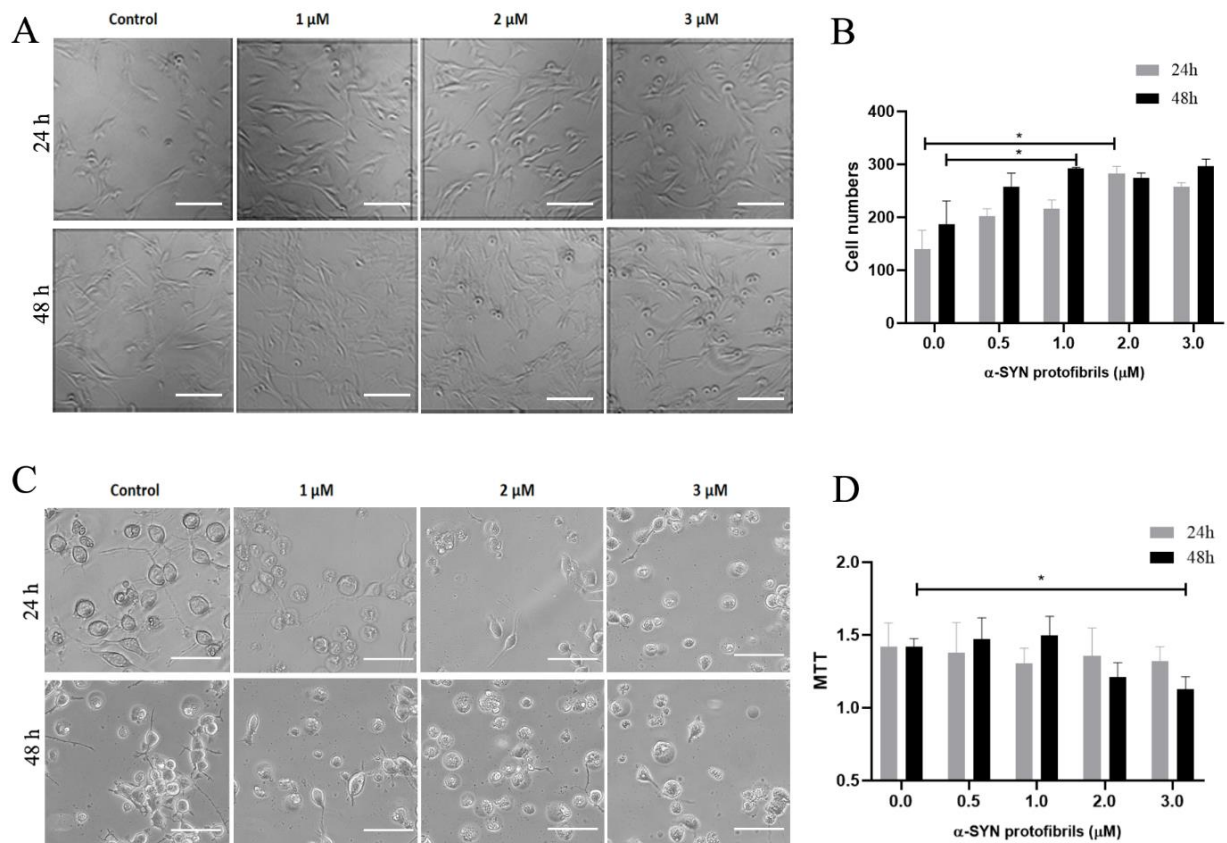

**Figure S5:  $\alpha$ -SYN treatments on U-87 MG and N2a cells in a time and concentration-dependent manner, related to Figure 6A-G.** A) U-87 MG cells treated with varying concentrations (0.5 $\mu$ M-3 $\mu$ M) of  $\alpha$ -SYN protofibrils showed time (24h and 48h) and concentration-dependent increase in cell numbers. B) Quantification of the cell numbers. Quantifications are done from 5 image frames of a set and each image frame has 100-250 cells. C) Neurons derived from differentiation of mouse neuroblastoma (N2a) cells treated with toxic  $\alpha$ -SYN protofibrils (0.5 $\mu$ M-3 $\mu$ M) for (24h and 48h). The treated cells were imaged and the images show time and concentration-dependent occurrence of toxic morphology and floating dead cells. D) MTT assay of N2a cells treated with varying concentrations of  $\alpha$ -SYN protofibrils at 24h and 48h. Scale bars are denoted on the images. Data are expressed as mean  $\pm$  SD, \*\*\*  $p \leq 0.001$ . Statistics were analysed using two-way ANOVA.  $n=3$ .



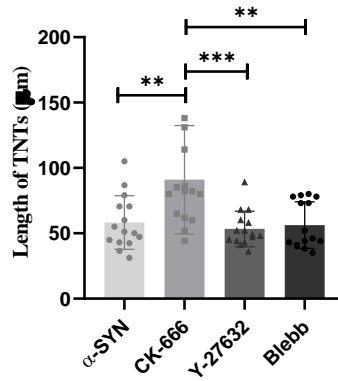

**Figure S6: Effect of inhibitors on TNT length, related to Figure 6I-M.** Length of TNTs formed in U-87 MG cells after treatment with  $1\mu\text{M}$   $\alpha\text{-SYN}$  protofibrils,  $50\mu\text{M}$  CK-666 (Arp2/3 inhibitor),  $5\mu\text{M}$  Y-27632 (ROCK inhibitor), and  $75\mu\text{M}$  Blebbistatin (Blebb) was measured using Image J software. Scale bars are denoted on the images. Quantifications are done from 15 image frames of a set and each image frame has 15-20 cells. Data are expressed as mean  $\pm$  SD, \*\*\*  $p \leq 0.001$ . Statistics were analysed using one-way ANOVA.  $n=3$ .

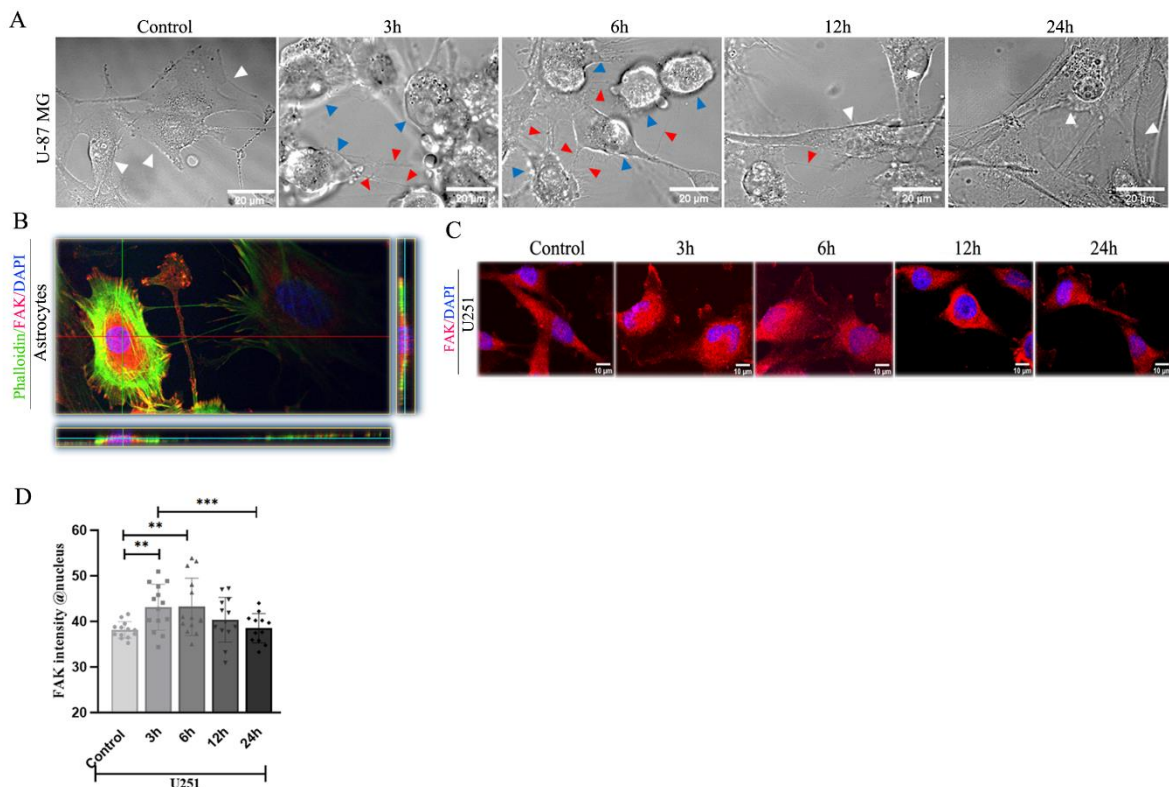

**Figure S7: Effect of  $\alpha\text{-SYN}$  on cell adherence and FAK translocation, related to Figure 7C-H.** A) U-87 MG cells were treated with  $1\mu\text{M}$   $\alpha\text{-SYN}$  protofibrils for 3-24h, and DIC images were taken. Blue arrows indicate non-adherent cells and red arrows indicate TNTs formed from the non-adherent cells. B) Nuclear translocation of FAK was established from a 3D view of the xz and yz planes. C) Nuclear FAK translocation in U251 cells and D) quantification of the FAK at the nucleus. Quantifications are done from 15 image frames of a set and each image frame has 15-20 cells. Scale bars are denoted on



the images. Data are expressed as mean  $\pm$  SD, \*\*\*  $p \leq 0.001$ . Statistics were analysed using two-way ANOVA.  $n=3$ .

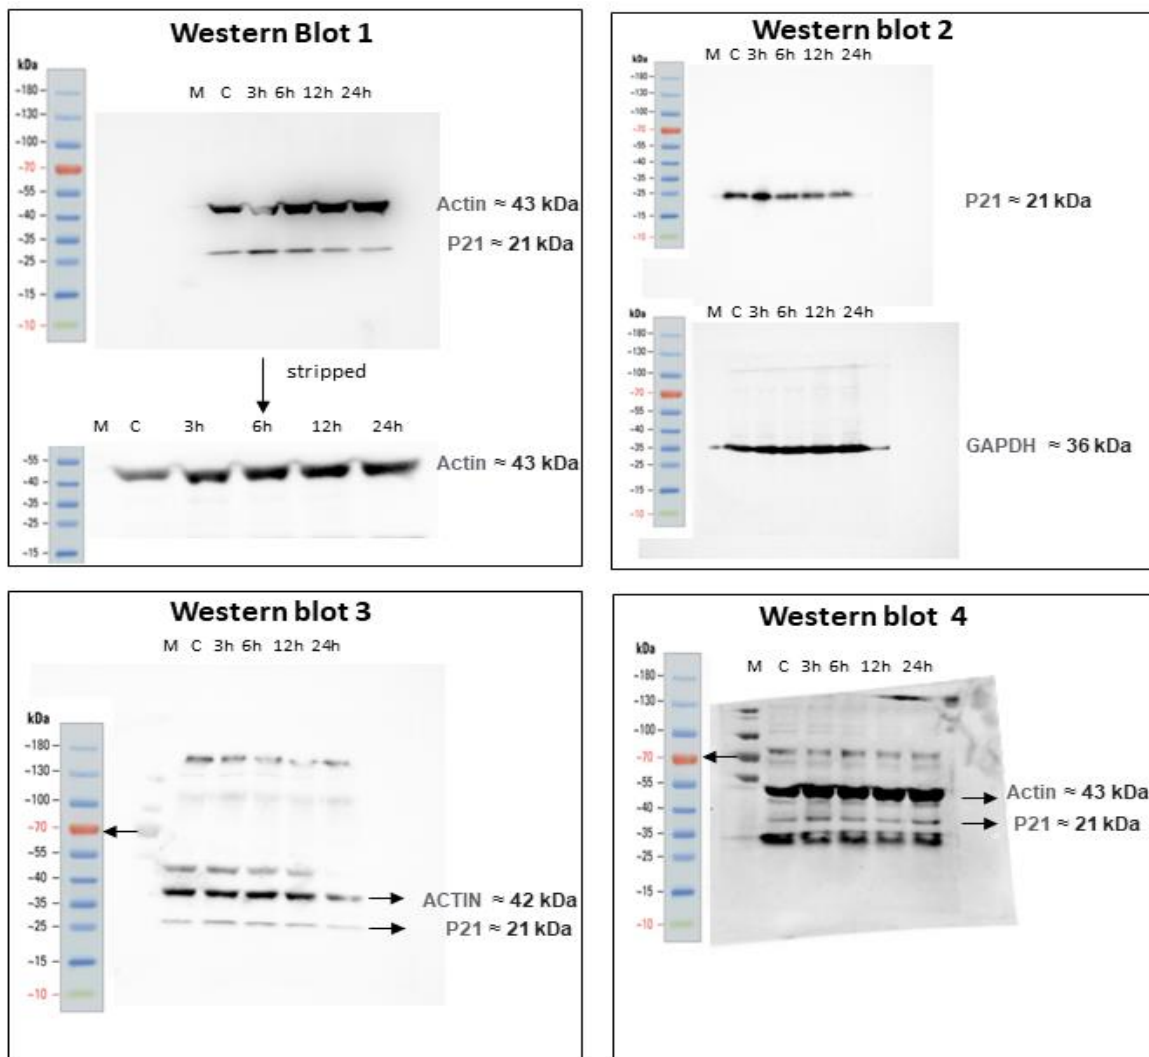

**Figure S8: Effect of  $\alpha$ -SYN treatment on senescence marker-P2, related to Figure 5H.** Full-length western blot (WB) images of 4 biological repeats of senescence marker-P21 (MW 21 kDa) (representing WB of Figure 5H) with loading controls (actin / GAPDH) are represented here, along with a protein ladder of molecular weight markers. The blots were developed with ECL solution, therefore all the proteins in the marker lanes (M) are not visible in some of the blots. Represented markers are demonstrated here to show the molecular weight of the corresponding bands. Blot 2 has been given GAPDH, then stripped and cut into 2 blots. To which p21 and ROCK1 are given. The same GAPDH blot is used in the supplementary figure 10.

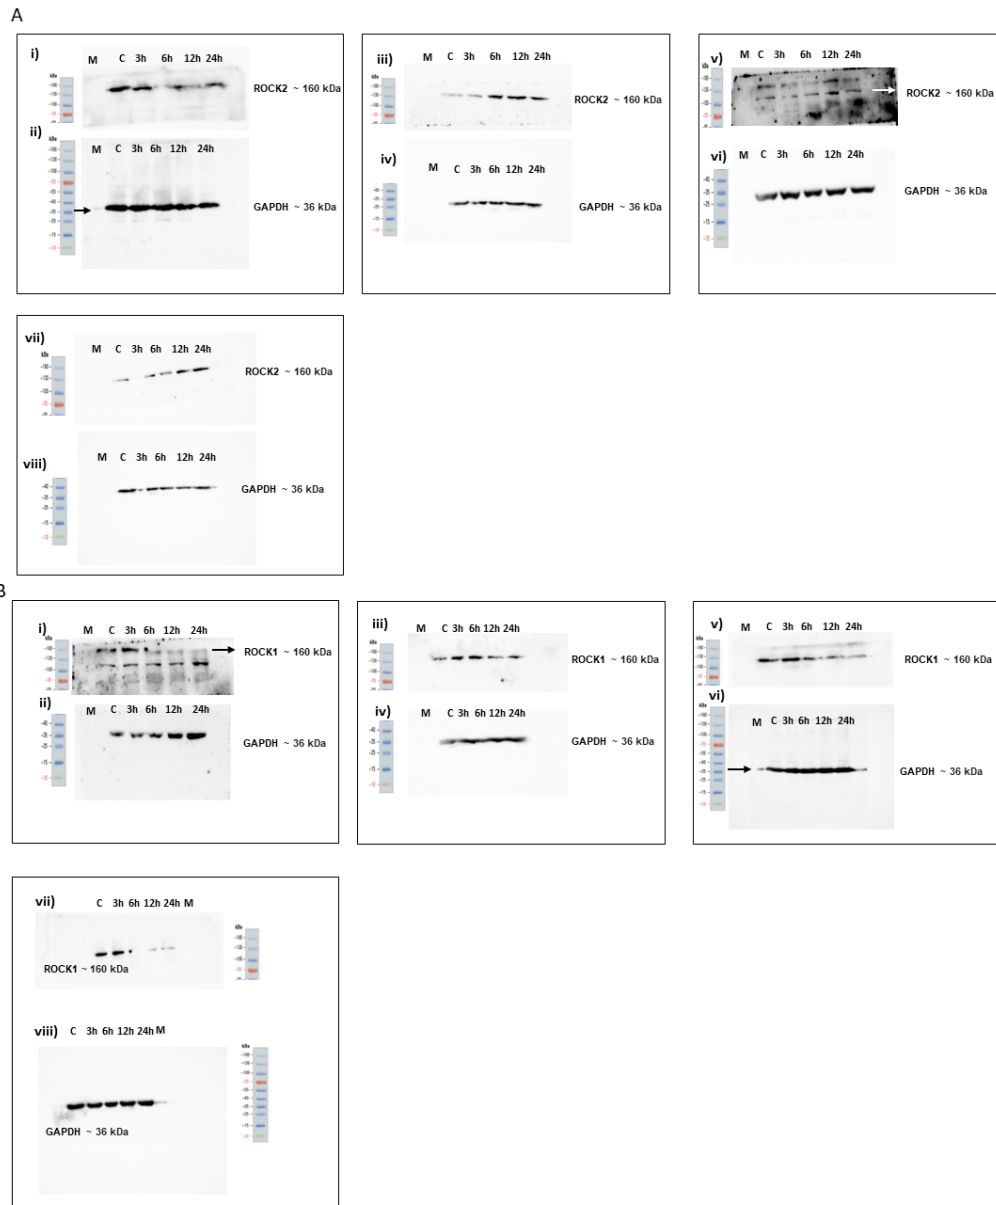

**Figure S9: Effect of  $\alpha$ -SYN treatment on ROCK pathway, related to Figure 7I, G.** Full-length WB images of 3 biological repeats of ROCK1 and ROCK2 (MW of 160 kDa) (representing WB of Figure 7I) with loading controls (GAPDH) are represented here, along with a protein ladder of molecular weight markers. A) After developing the blot (ii) with GAPDH, the blot was stripped and cut at 55kDa. The top portion (i) was given ROCK2 antibody and developed while the bottom part [Supplementary Figure 10 B (i)] was given pERK1-pERK2 cocktail. Blots (iii) and (iv) were cut from a single blot and the top portion (iii) was given ROCK2 antibody and the bottom portion was given GAPDH antibody. Blots (v) and (vi) are also cut from a single blot. Similarly, blots (vii) and (viii) were cut from a single blot and the top portion (vii) was given ROCK2 antibody and the bottom portion (viii) was given GAPDH antibody. B) Blots (i) and (ii) are cut from a single blot and similarly blots (iii) and (iv) are cut from a single blot. Blots (i) and (iii) were given ROCK1 antibody and blots (ii) and (iv) were given GAPDH antibody. After developing the blot (vi) with GAPDH it was stripped and cut into two. The top portion was given ROCK1

antibody and the bottom portion (Supplementary Figure 8 WB 2) was given p21 antibody. After developing blot (viii) with GAPDH, the top portion of the blot was cut and developed with (vii) ROCK 1 antibody. In some of the biological repeats, ROCK1 and ROCK2 showed another non-specific band near the original band of 160 kDa. The blots were developed with ECL solution, therefore in some of the WBs, no markers are visible. Represented markers are demonstrated here to show the molecular weight of the corresponding bands. All the blots are biological repeats.

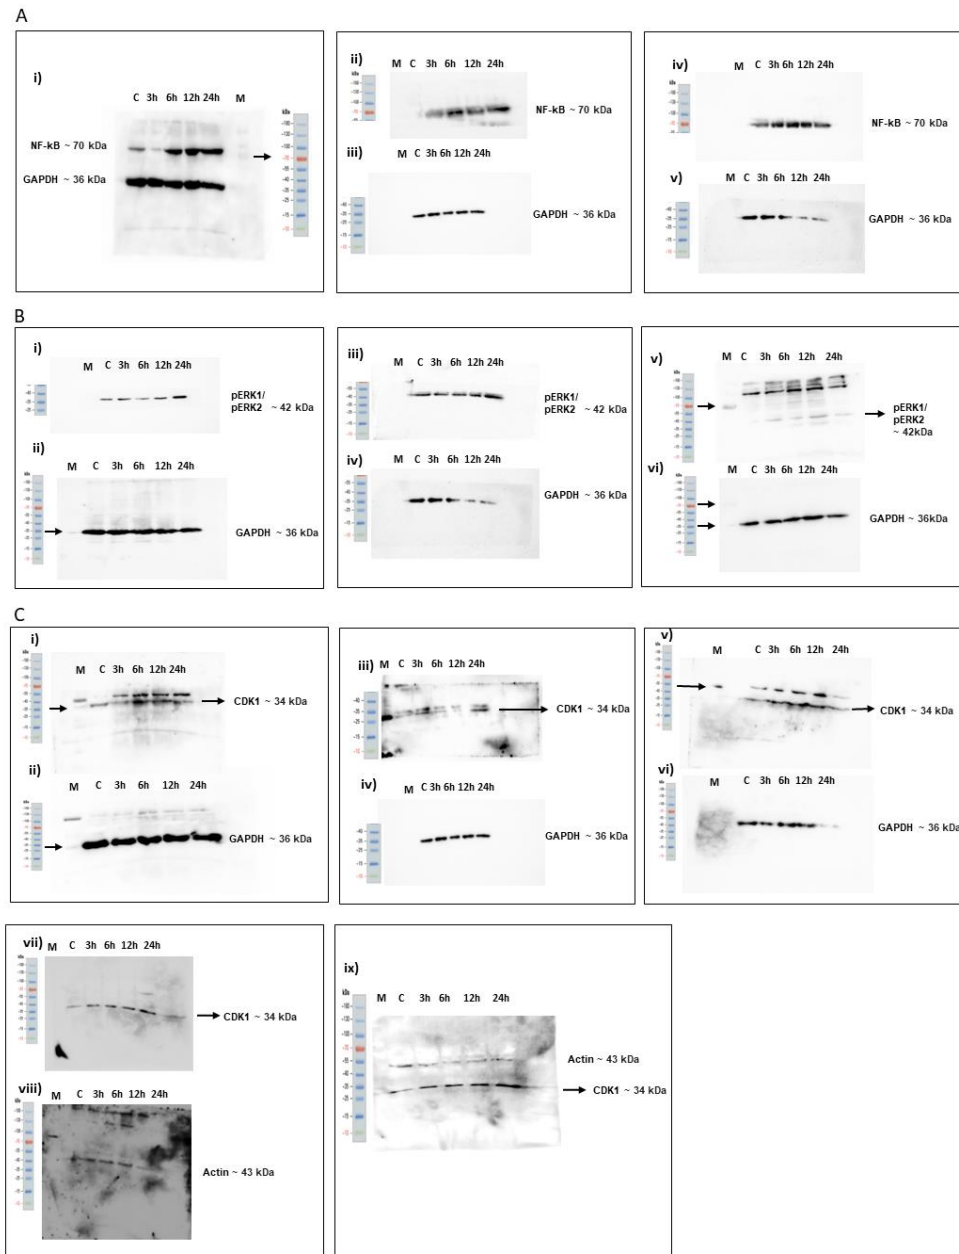

**Figure S10: Effect of  $\alpha$ -SYN treatment on Proliferation pathway, related to Figure 7 K,L.** Full-length WB images of 3 biological repeats of NF- $\kappa$ B (MW 70 kDa), pERK1/ERK2 (MW 42 kDa), and Cdk1 (MW 34 kDa) (representing WB of Figure 7K) with loading controls (GAPDH) are represented here, along with a protein ladder of molecular weight markers. A) (i) NF- $\kappa$ B and GAPDH antibodies were given together. Blots (ii) and (iii) were cut from a single blot and the top portion (ii) was given NF- $\kappa$ B

antibody and the bottom portion was given GAPDH antibody. Similarly, blots (iv) and (v) are cut from a single blot. B) As mentioned earlier blot (ii) was stripped after giving GAPDH and the bottom portion (i) was given pERK1-pERK2 cocktail. Blot A) (v) after developing with GAPDH was stripped and given pERK1-pERK2 cocktail (iii). Hence A (v) and B (iv) are the same GAPDH blots. After developing with GAPDH blot (vi) was stripped and given pERK1-pERK2 cocktail (v). C) After developing blot (ii) with GAPDH the blot was stripped and then given Cdk1 antibody (i). After developing A) (iii) with GAPDH the blot was stripped and given Cdk1 antibody (iii). Hence the blots A) (iii) and C) (iv) are the same. Blot (vi) after giving GAPDH was stripped and given Cdk1 antibody (v). Cdk1 and GAPDH have almost the same Molecular weight (Cdk1 34kDa and GAPDH 36 kDa). Therefore, faint GAPDH bands are appearing as double bands on top of the Cdk1 bands in the WBs C)(i), (iii) and (v). Blot (vii) was developed with Cdk1 antibody, stripped and given actin (viii). Blot(ix) was simultaneously developed with actin and Cdk1 antibodies. The blots were developed with ECL solution; therefore, in some of the WBs, no molecular markers are visible. Represented markers are demonstrated here to show the molecular weight of the corresponding bands. All the blots are biological repeats.
